# Supplementary material for: The Molecular Mechanisms of Oleanane Aldehyde-β-enone Cytotoxicity against Doxorubicin-Resistant Cancer Cells
Source: MDPI journal article supplement (doi:10.3390/biology12030415), 2023-03-08
Supplement: s1 [file s1]

# The molecular mechanisms of oleanane aldehyde- $\beta$ -enone cytotoxicity against doxorubicin-resistant cancer cells

Natalia Moiseeva, Daria Eroshenko, Lidia Laletina, Ekaterina Rybalkina, Olga Susova, Aida Karamysheva, Irina Tolmacheva, Mikhail Nazarov, and Victoria Grishko

Table S1. Primers for Real-Time PCR.

| Gene         | Forward                   | Reverse                   |
|--------------|---------------------------|---------------------------|
| <i>ABCB1</i> | GGGATGGTCAGTGTTGATGGA     | GCTATCGTGGTGGCAAACAATA    |
| <i>ABCC1</i> | GTGAATCGTGGCATCGACATA     | GCTTGGGACGGAAGGGAATC      |
| <i>ABCG2</i> | TGAGCCTACAACCTGGCTTAGA    | CCCTGCTTAGACATCCTTTTCAG   |
| <i>RPL0</i>  | CCTTCTCCTTTGGGCTGGTCATCCA | CAGACACTGGCAACATTGCGGACAC |

Table S2. Prediction of **OA** and verapamil as P-gp substrate or P-gp inhibitor via web services

| Web service                                                                                       | Substrate |           | Inhibitor |           |
|---------------------------------------------------------------------------------------------------|-----------|-----------|-----------|-----------|
|                                                                                                   | <b>OA</b> | Verapamil | <b>OA</b> | Verapamil |
| AdmetSAR (version 2.0)<br><a href="https://admetmesh.scbdd.com/">https://admetmesh.scbdd.com/</a> | ---       | +++       | ---       | +++       |
| ADMETlab 2.0<br><a href="http://lmmd.ecust.edu.cn/admet2">http://lmmd.ecust.edu.cn/admet2</a>     | -         | +         | +         | +         |
| pkCSM<br><a href="http://biosig.unimelb.edu.au/pkcsml/">http://biosig.unimelb.edu.au/pkcsml/</a>  | -         | +         | +         | +         |
| PgpRules<br><a href="https://pgprules.cmdm.tw/">https://pgprules.cmdm.tw/</a>                     | +         | +         | +         | +         |

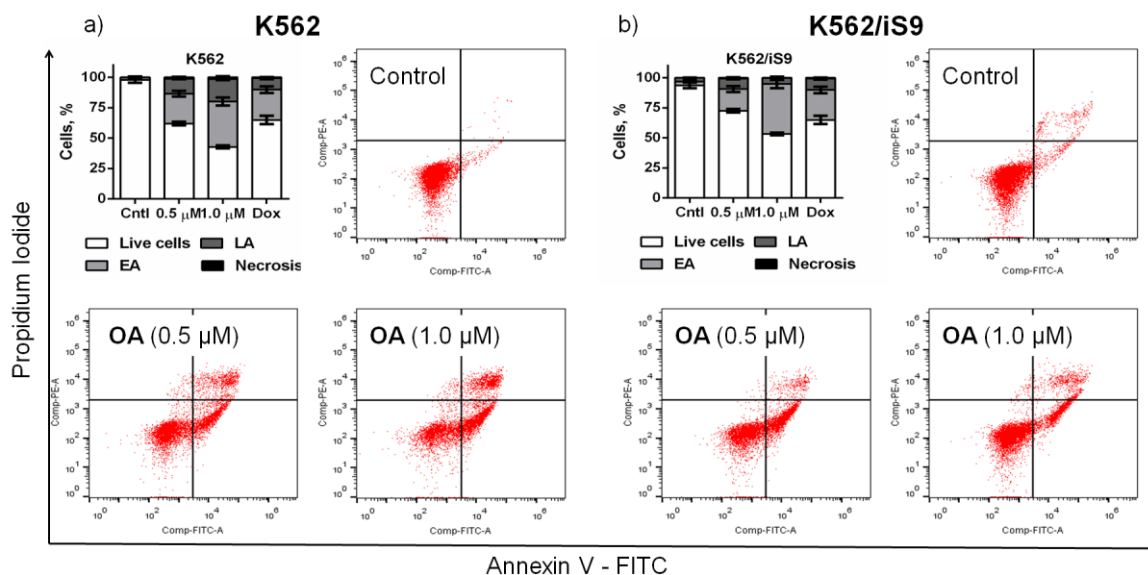

Figure S1. Annexin V-FITC/PI double staining for detection of apoptosis in K562 (a) and K562/iS9 (b) cells after treatment with **OA** for 24 h: LA – late apoptosis, EA – early apoptosis.

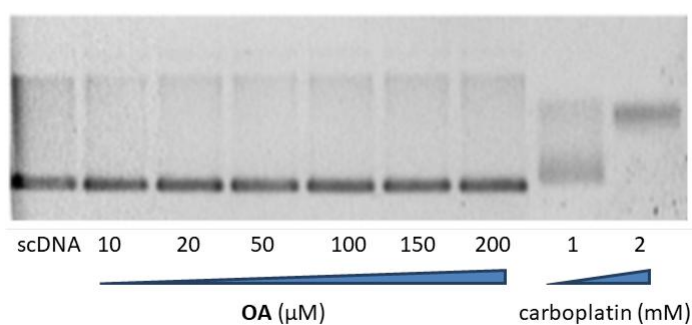

Figure S2. The interaction of **OA** with supercoiled DNA.

The interaction of the substances with DNA causes the retardation of DNA migration in agarose gel-electrophoresis. Carboplatin was used as a positive control. The supercoiled (scDNA) was incubated for 30 min with **OA** or carboplatin.

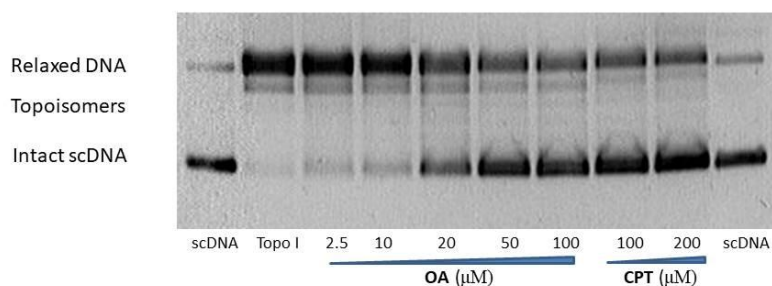

Figure S3. The effect of **OA** on the activity of Topoisomerase I.

Camptothecin (CPT) was used as a positive control.

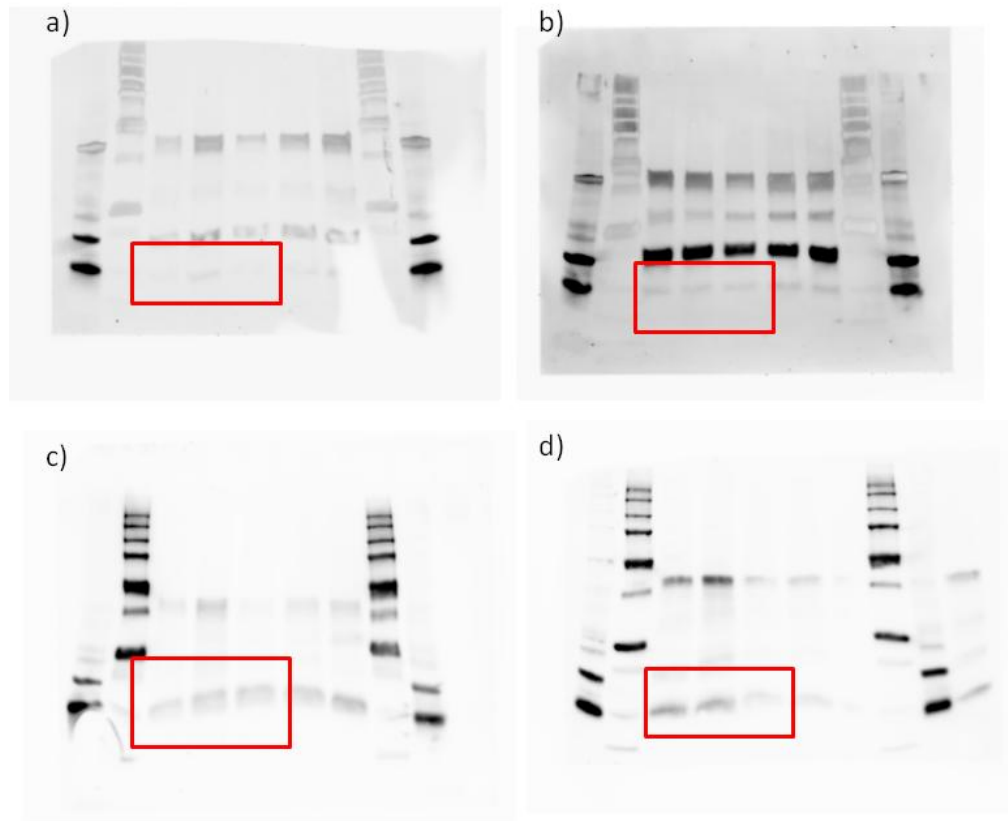

Figure S4: Expression of cytochrome *c* in HBL-100 and HBL-100/Dox cells after **OA**-treatment for 16 h. Red squares indicate lines used in this study

**a)** WB of cytosolic fraction of the HBL-100 cell lisates after **OA**-treatment for 16 h with 0.5 and 1.0  $\mu\text{M}$ : line 1, 6, 7, 10 – inapplicable in this research, lines 2, 8 - MW, lines 3 - 4 – **OA**-treatment with 0.5 and 1.0  $\mu\text{M}$ , line 5 - control. Staining with primary AT of cytochrom *c* (18 kDa)

**b)** WB of cytosolic fraction of the HBL-100/Dox cell lisates after **OA**-treatment for 16 h with 1.0 and 2.0  $\mu\text{M}$ : line 1, 6, 7, 10 – inapplicable in this research, lines 2, 8 - MW, lines 3 - 4 – **OA**-treatment with 1.0 and 2.0  $\mu\text{M}$ , line 5 - control. Staining with primary AT of cytochrom *c* (18 kDa)

**c)** WB of mitochondrial fraction of the HBL-100 cell lisates after **OA**-treatment for 16 h with 0.5 and 1.0  $\mu\text{M}$ : line 1, 6, 7, 10 – inapplicable in this research, lines 2, 8 - MW, lines 3 - 4 – **OA**-treatment with 0.5 and 1.0  $\mu\text{M}$ , line 5 - control. Staining with primary AT of cytochrom *c* (18 kDa)

**d)** WB of mitochondrial fraction of the HBL-100/Dox cell lisates after **OA**-treatment for 16 h with 1.0 and 2.0  $\mu\text{M}$ : line 1, 6, 7, 10 – inapplicable in this research, lines 2, 8 - MW, lines 3 - 4 – **OA**-treatment with 1.0 and 2.0  $\mu\text{M}$ , line 5 - control. Staining with primary AT of cytochrom *c* (18 kDa)

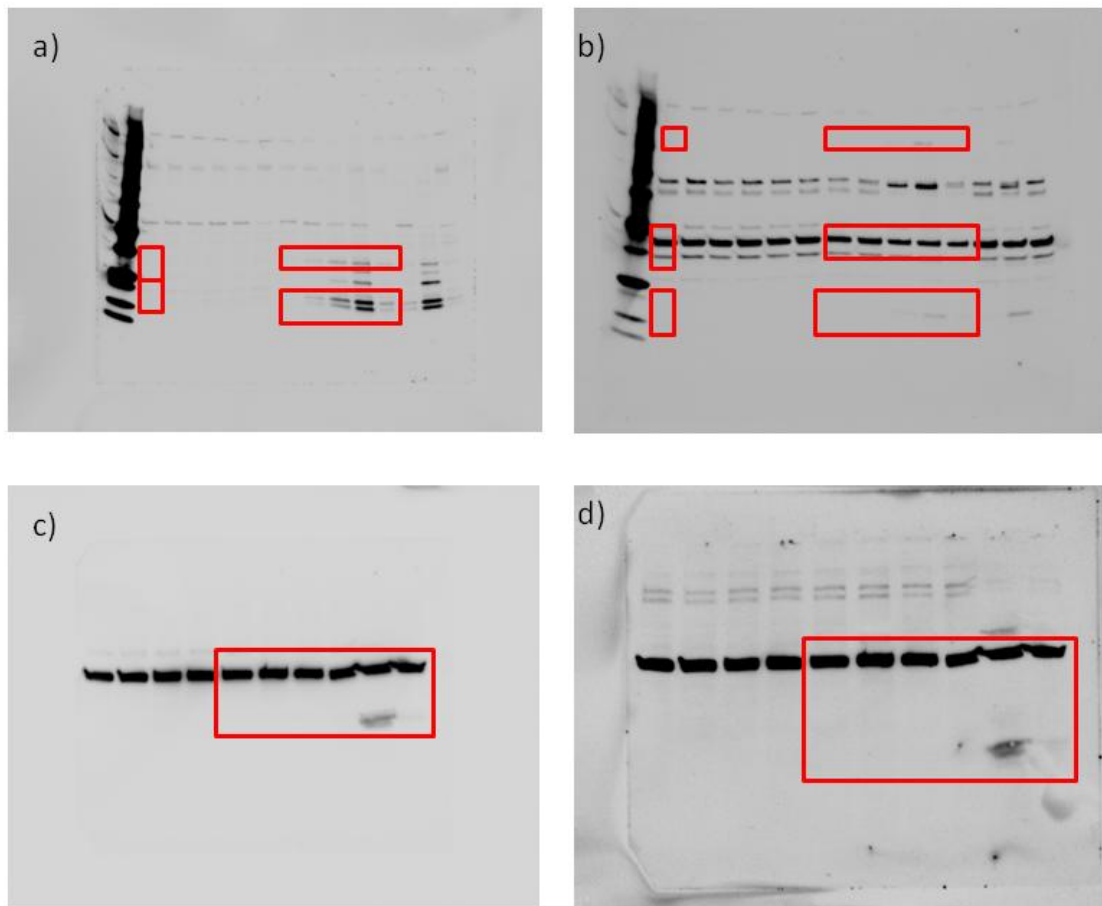

Figure S5: Expression of caspases-3,-6,-7,-8, and -9 and PARP in HBL-100 cells after OA-treatment for 20, 24, 30, 36 and 48 h. Red squares indicate lines used in this study

**a)** WB of HBL-100 cell lisates after **OA**-treatment for 20, 24, 30, 36, 48 h: line 1 – MW; Line 2 – Control ; lines 3 -7, 13-15 - inapplicable in this research; lines 8 - 12 – **OA**-treatment for 20, 24, 30, 36, 48 h. Staining with primary AT of cleavage caspase-3 (17/19 kDa) and caspase-9 (37 kDa)

**b)** WB of HBL-100 cell lisates after **OA**-treatment for 20, 24, 30, 36, 48 h: line 1 – MW; Line 2 – Control ; lines 3 -7, 13-15 - inapplicable in this research; lines 8 - 12 – **OA**-treatment for 20, 24, 30, 36, 48 h. Staining with primary AT of cleavage caspase-6 (18 kDa), b-actin (45 kDa) and PARP (89 kDa).

**c)** WB of HBL-100 cell lisates after **OA**-treatment for 20, 24, 30, 36, 48 h lines 1 - 4 - inapplicable in this research; line 5 – control ; lines 6 - 9 – **OA**-treatment for 20, 24, 30, 36, 48 h. Staining with primary AT of cleavage caspase-8 (18 kDa) and b-actin (45 kDa)

**d)** WB of HBL-100 cell lisates after **OA**-treatment for 20, 24, 30, 36, 48 h: lines 1 - 4 - inapplicable in this research; line 5 – control ; lines 6 - 9 – **OA**-treatment for 20, 24, 30, 36, 48 h. Staining with primary AT of cleavage caspase-7 (18 kDa) and b-actin (45 kDa)

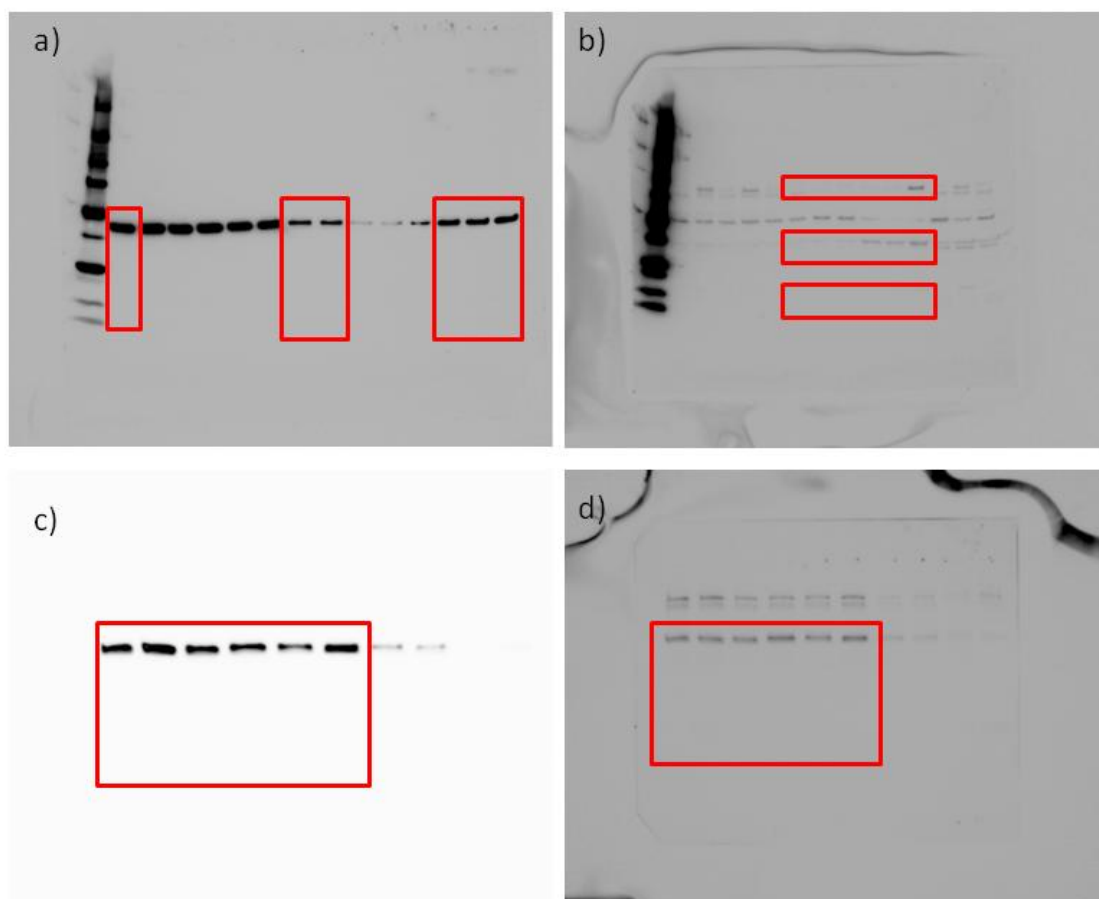

Figure S6: Expression of caspases-3,-6,-7,-8, and -9 and PARP in HBL-100/Dox cells after **OA**-treatment for 20, 24, 30, 36 and 48 h. Red squares indicate lines used in this study

**a)** WB of HBL-100/Dox cell lisates after **OA**-treatment for 20, 24, 30, 36, 48 h: line 1 – MW; lines 2-6, 10- 12 - inapplicable in this research; line 7 – Control ; lines 8, 9 – **OA**-treatment for 20, 24 h; lines 13-15 – **OA**-treatment for 30, 36, 48 h. Staining with primary AT of cleavage caspase-3 (17/19 kDa) and b-actin (45 kDa)

**b)** WB of HBL-100/Dox cell lisates after **OA**-treatment for 20, 24, 30, 36, 48 h: line 1 – MW; lines 2-6, 13-15 - inapplicable in this research; line 7 – Control ; lines 8 - 12 – **OA**-treatment for 20, 24 , 30, 36, 48 h. Staining with primary AT of cleavage caspase-6 (18 kDa), caspase-9 (37 kDa) and PARP (89 kDa).

**c)** WB of HBL-100/Dox cell lisates after **OA**-treatment for 20, 24, 30, 36, 48 h: line 1 – Control ; lines 2 -5 - **OA**-treatment for 20, 24, 30, 36, 48 h; lines 6 - 9 – inapplicable in this research. Staining with primary AT of cleavage caspase-8 (18 kDa) and b-actin (45 kDa).

**d)** WB of HBL-100/Dox cell lisates after **OA**-treatment for 20, 24, 30, 36, 48 h: line 1 – Control ; lines 2 -5 - **OA**-treatment for 20, 24, 30, 36, 48 h; lines 6 - 9 – inapplicable in this research. Staining with primary AT of cleavage caspase-7 (18 kDa) and b-actin (45 kDa)
